# Supplementary material for: Theranostic reduction-sensitive gemcitabine prodrug micelles for near-infrared imaging and pancreatic cancer therapy
Source: Royal Society of Chemistry journal article supplement (doi:10.1039/c5nr06734k), 2015-11-09
Supplement: c5nr06734k1.pdf [file c5nr06734k1.pdf]

**Electronic Supplementary Information for**  
Theranostic reduction-sensitive gemcitabine prodrug  
micelles for near-infrared imaging and pancreatic cancer  
therapy

Haijie Han, Haibo Wang, Yangjun Chen, Zuhong Li, Yin Wang, Qiao Jin\*, Jian Ji\*

MOE Key Laboratory of Macromolecule Synthesis and Functionalization of Ministry  
of Education, Department of Polymer Science and Engineering, Zhejiang University,

Hangzhou, 310027, China

E-mail: [jinqiao@zju.edu.cn](mailto:jinqiao@zju.edu.cn) (Q. Jin); [jijian@zju.edu.cn](mailto:jijian@zju.edu.cn) (J. Ji)

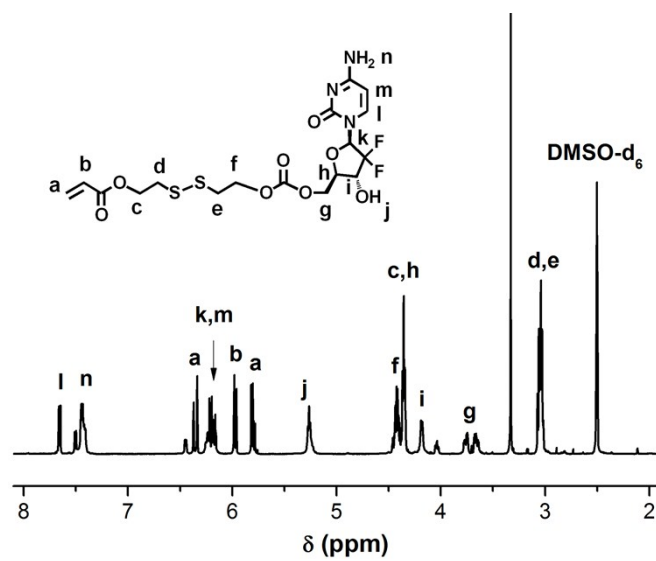

**Figure S1.** <sup>1</sup>H NMR spectrum of HSEA-GEM (DMSO-d<sub>6</sub>).

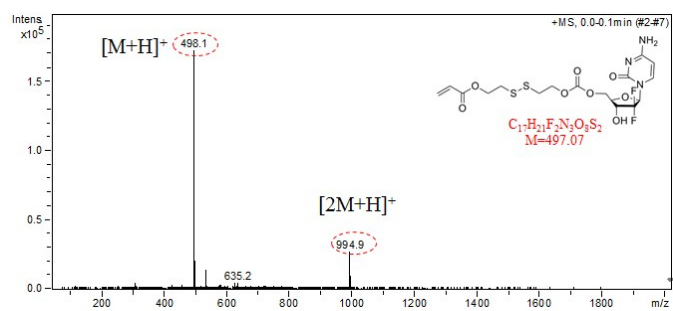

**Figure S2.** Mass spectrum of HSEA-GEM

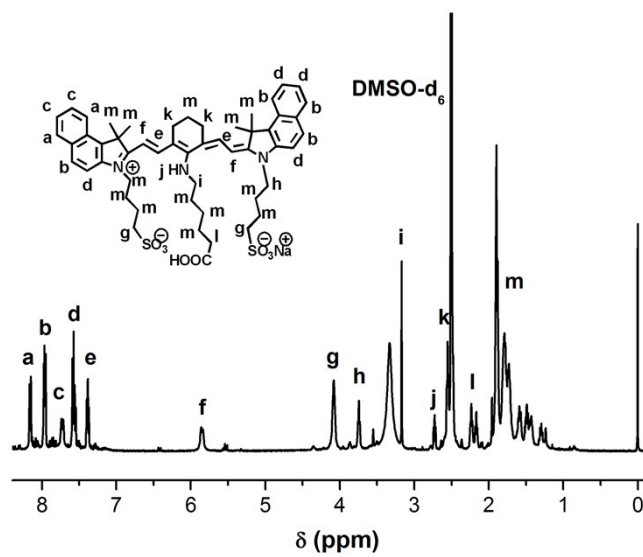

**Figure S3.**  $^1\text{H}$  NMR spectrum of IR820-COOH ( $\text{DMSO-d}_6$ ).

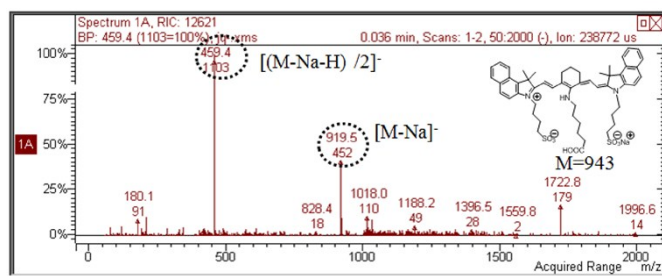

**Figure S4.** Mass spectrum of IR820-COOH

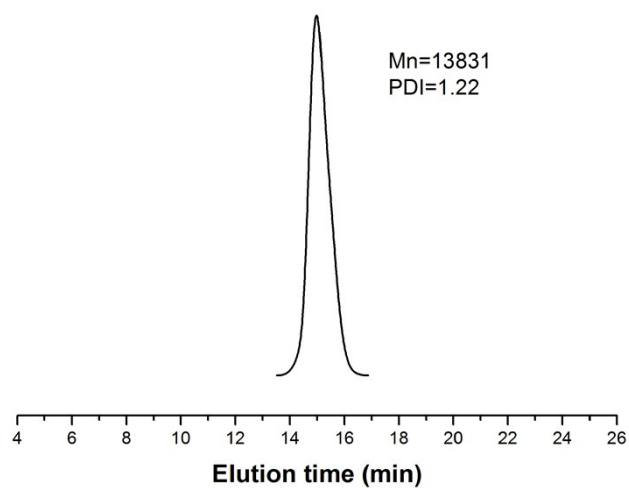

**Figure S5.** GPC results of PEG-*b*-(PLA-*co*-PMAC) with THF as the eluent and polystyrene as the standards

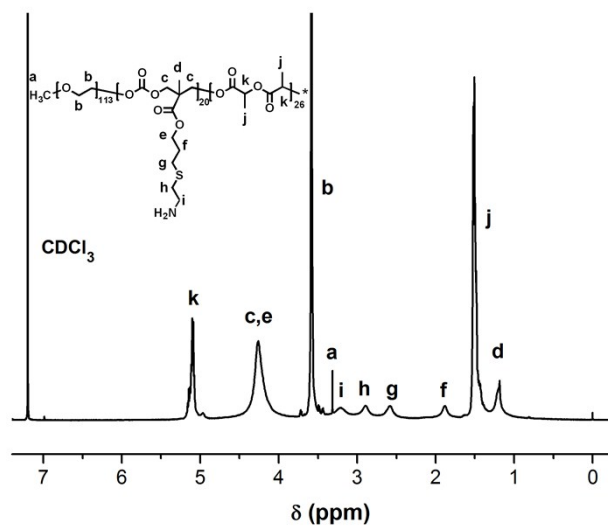

**Figure S6.** <sup>1</sup>H NMR spectrum of amino functionalized PEG-*b*-(PLA-*co*-PMAC) (CDCl<sub>3</sub>).
